# Supplementary material for: Comparing Clinical Outcomes of COVID-19 and Influenza-Induced Acute Respiratory Distress Syndrome: A Propensity-Matched Analysis
Source: MDPI journal article supplement (doi:10.3390/v15040922), 2023-04-05
Supplement: s1 [file s1]

Supplementary Table S1: ICD 10 Codes

| Disease/Procedure                   | ICD Codes                                                               |
|-------------------------------------|-------------------------------------------------------------------------|
| Acute respiratory distress syndrome | J810, J80                                                               |
| COVID-19                            | U071, U00, U49, U50, U85, J1282                                         |
| Influenza                           | J09X1, J09X2, J09X3, J09X9,                                             |
|                                     | J1000, J101, J1008, J101, J102, J1081,                                  |
|                                     | J1082, J1083, J1089, J1100, J1108, J111,                                |
|                                     | J112, J1181, J1182, J1183, J1189                                        |
| Vasopressor                         | 3E030XZ, 3E033XZ, 3E040XZ, 3E043XZ, 3E050XZ, 3E053XZ, 3E060XZ, 3E063XZ  |
| Mechanical Circulatory Support      | 5A02110, 5A02210, 5A0211D, 02HA3RZ, 5A02116, 5A0221D,                   |
|                                     | 5A1522F, 5A1522G, 5A1522H, 5A15A2F, 5A15A2G, 5A15A2H, 5A15223           |
| Mechanical ventilation invasive     | 0BH17EZ, 0BH18EZ, 5A1935Z, 5A0945Z, 5A0955Z                             |
| Non-invasive mechanical ventilation | 5A09457, 5A09458, 5A09358, 5A09557, 5A09558, 5A09357                    |
| Sudden cardiac arrest               | I462, I468, I469                                                        |
| hemodialysis                        | 5A1D70Z, 5A1D90Z, 5A1D80Z, 5A1D00Z, 5A1D60Z                             |
| Cardiogenic Shock                   | R570                                                                    |
| Chronic Kidney Disease              | N181, N182, N1830, N1831, N1832, N184, N185, N189                       |
| Acute kidney injury                 | N170, N171, N172, N178, N179, N990                                      |
| Acute liver failure                 | K7200, K7201, K712                                                      |
| Venous thromboembolism              | I82210, I82220, I82290, I82401, I82402, I82403, I82409, I82411,         |
|                                     | I82412, I82413, I82419, I82421, I82422, I82423, I82429, I82431, I82432, |
|                                     | I82433, I82439, I82441, I82442, I82443, I82449, I82451, I82452,         |
|                                     | I82453, I82459, I82461, I82462, I82463, I82469, I82491, I82492, I82493, |
|                                     | I82499, I824Y1, I824Y2, I824Y3, I824Y9, I824Z1, I824Z2, I824Z3, I824Z9, |
|                                     | I82601, I82602, I82603, I82609, I82611, I82612, I82613, I82619, I82621, |
|                                     | I82622, I82623, I82629, I82890, I8290, I82A11, I82A12, I82A13, I82A19,  |
|                                     | I82B11, I82B12, I82B13, I82B19, I82C11, I82C12, I82C13, I82C19, I1260,  |
|                                     | I2601, I2602, I2690, I2692, I2693, I2694, I2699, I2609                  |
| Smoking                             | F17, F172, F1720, F17200, F17201, F17203, F17208,                       |

|                                               |                                                                |
|-----------------------------------------------|----------------------------------------------------------------|
|                                               | F17209, F1721, F17210, F17211, F17213, F17218,                 |
|                                               | F17219, F1722, F17220, F17221, F17223, F17228,                 |
|                                               | F17229, F1729, F17290, F17291, F17293, F17298, F17299, Z87891  |
| History of percutaneous coronary intervention | Z9861, Z9861                                                   |
| History of Coronary Artery Bypass Surgery     | Z951                                                           |
| Previous Myocardial Infarction                | I252                                                           |
| Coronary Artery Disease                       | I2510, I25111, I25118, I25119, I252, I253, I254,               |
|                                               | I2541, I2542, I255, I256, I257, I2570, I25700,                 |
|                                               | I25701, I25708, I25709, I2571, I25710, I25711, I25718,         |
|                                               | I25719, I2572, I25720, I25721, I25728, I25729, I2573, I25730,  |
|                                               | I25731, I25738, I25739, I2575, I25750, I25751, I25758, I25759, |
|                                               | I2576, I25760, I25761, I25768, I25769                          |
| Chronic Pulmonary Disease                     | Elixhauser comorbidities index                                 |
| Diabetes                                      | Elixhauser comorbidities index                                 |
| AIDS                                          | Elixhauser comorbidities index                                 |
|                                               |                                                                |
| Hypothyroidism                                | Elixhauser comorbidities index                                 |
| Autoimmune                                    | Elixhauser comorbidities index                                 |
| Dementia                                      | Elixhauser comorbidities index                                 |
| Depression                                    | Elixhauser comorbidities index                                 |
|                                               |                                                                |
| Lymphoma                                      | Elixhauser comorbidities index                                 |
| Leukemia                                      | Elixhauser comorbidities index                                 |
| Metastatic Cancer                             | Elixhauser comorbidities index                                 |
| Solid Tumor Without Metastasis (2 kinds)      | Elixhauser comorbidities index                                 |
|                                               |                                                                |
| Obesity                                       | Elixhauser comorbidities index                                 |
| Drug Abuse                                    | Elixhauser comorbidities index                                 |
| Hypertension                                  | Elixhauser comorbidities index                                 |

|                                 |                                |
|---------------------------------|--------------------------------|
| PAD Peripheral vascular disease | Elixhauser comorbidities index |
| Alcohol                         | Elixhauser comorbidities index |

**Supplementary Table S2: COVID 19 ARDS (C-ARDS) and Influenza ARDS (I-ARDS): propensity 1:1 matched patient level characteristic. SD=Standard Deviation.**

| Characteristics              | C-ARDS (%)    | I-ARDS (%)    | p value |
|------------------------------|---------------|---------------|---------|
| n = 5,750                    | 2,875         | 2,875         | --      |
| Gender (%)                   |               |               | 0.555   |
| Female                       | 1,450 (50.43) | 1,400 (48.69) |         |
| Male                         | 1,425 (49.56) | 1,475 (51.30) |         |
| Mean Age Years (SD)          |               |               | --      |
| Female                       | 56.45 (17.11) | 58.66 (17.15) |         |
| Male                         | 57.37 (14.11) | 54.91 (14.06) |         |
| AGE Groups (%)               |               |               | 0.455   |
| >=18-29                      | 175 (6.08)    | 130 (4.50)    |         |
| 30-49                        | 660 (22.95)   | 744 (25.91)   |         |
| 50-69                        | 1,425 (49.56) | 1,369 (47.65) |         |
| >=70                         | 615 (21.39)   | 630 (21.91)   |         |
| RACE (%)                     |               |               | 0.951   |
| White                        | 1,770 (62.54) | 1,748 (62.43) |         |
| Asian or Pacific<br>Islander | 65 (2.29)     | 70 (2.50)     |         |
| Black                        | 475 (16.78)   | 494 (17.71)   |         |
| Hispanic                     | 420 (14.84)   | 378 (13.59)   |         |
| Native American              | 50 (1.76)     | 64 (2.32)     |         |
| Other                        | 50 (1.76)     | 40 (1.43)     |         |

|                       |               |               |        |
|-----------------------|---------------|---------------|--------|
| MEDIAN HOUSEHOLD      |               |               | 0.976  |
| INCOME (%)            |               |               |        |
| ≤\$49,999             | 1,000 (35.52) | 969 (34.51)   |        |
| \$50,000-64,999       | 800 (28.41)   | 824 (29.35)   |        |
| \$65,000-85,999       | 505 (17.93)   | 517 (18.32)   |        |
| ≥\$86,000             | 510 (18.11)   | 500 (17.79)   |        |
| INSURANCE STATUS      |               |               | 0.990  |
| (%)                   |               |               |        |
| Medicaid              | 560 (19.47)   | 579 (20.17)   |        |
| Medicare              | 1,235 (42.95) | 1,211 (42.08) |        |
| No charge             | 20 (0.69)     | 25 (8.86)     |        |
| Other                 | 80 (2.78)     | 76 (2.60)     |        |
| Private Insurance     | 830 (28.86)   | 814 (28.34)   |        |
| Self-pay              | 150 (5.21)    | 170 (5.91)    |        |
| HOSPITAL DIVISION     |               |               | <0.001 |
| (%)                   |               |               |        |
| East North Central    | 530 (18.43)   | 469 (16.34)   |        |
| East South Central    | 190 (6.60)    | 265 (9.21)    |        |
| Middle Atlantic       | 510 (17.73)   | 215 (7.47)    |        |
| Mountain              | 205 (7.13)    | 151 (5.21)    |        |
| New England           | 185 (6.43)    | 113 (4.00)    |        |
| Pacific               | 220 (7.65)    | 360 (12.52)   |        |
| South Atlantic        | 435 (15.13)   | 640 (22.26)   |        |
| West North Central    | 230 (8.00)    | 214 (7.47)    |        |
| West South Central    | 370 (12.86)   | 336 (15.47)   |        |
| HOSPITAL BED SIZE (%) |               |               | 0.055  |

|                                 |               |               |        |
|---------------------------------|---------------|---------------|--------|
| Large                           | 1,525 (53.04) | 1,555 (54.08) |        |
| Medium                          | 675 (23.47)   | 795 (27.65)   |        |
| Small                           | 675 (23.47)   | 525 (18.26)   |        |
| HOSPITAL TEACHING<br>STATUS (%) |               |               | 0.331  |
| Rural                           | 250 (8.69)    | 220 (7.65)    |        |
| Urban nonteaching               | 385 (13.39)   | 470 (16.34)   |        |
| Urban teaching                  | 2,240 (77.91) | 2,185 (76.00) |        |
| COMORBIDITIES (%)               |               |               |        |
| Coronary Artery<br>Disease      | 335 (11.65)   | 525 (81.73)   | 0.001  |
| Myocardial infarction           | 85 (2.95)     | 110 (3.82)    | 0.415  |
| Hypertension                    | 1,880 (65.39) | 1,871 (65.04) | 0.901  |
| Diabetes                        | 1,100 (38.26) | 1,131 (39.47) | 0.671  |
| Cancer                          | 175 (6.08)    | 170 (5.91)    | 0.901  |
| Obesity                         | 750 (26.08)   | 820 (28.52)   | 0.354  |
| Drug Abuse                      | 140 (4.86)    | 165 (5.73)    | 0.510  |
| Smoking                         | 665 (23.13)   | 1,010 (35.13) | <0.001 |
| Alcohol                         | 125 (4.34)    | 156 (5.39)    | 0.411  |
| Chronic Pulmonary<br>Disease    | 980 (34.08)   | 980 (34.08)   | 1.000  |
| HIV                             | 0 (0.00)      | 16 (0.52)     | 0.082  |
| Peripheral Vascular<br>Disease  | 95 (3.30)     | 101 (3.47)    | 0.870  |
| CKD                             | 305 (10.60)   | 255 (8.87)    | 0.319  |
| Hypothyroidism                  | 335 (11.65)   | 350 (12.17)   | 0.784  |
| Autoimmune                      | 135 (4.69)    | 151 (5.21)    | 0.683  |

|            |            |             |       |
|------------|------------|-------------|-------|
| Depression | 280 (9.73) | 291 (10.08) | 0.843 |
| Dementia   | 70 (2.43)  | 102 (3.47)  | 0.297 |

---
